# Supplementary material for: Elevated ratio of acylated to unacylated ghrelin in children and young adults with Prader–Willi syndrome
Source: Springer Nature journal article supplement (doi:10.1007/s12020-015-0614-x), 2015-05-19

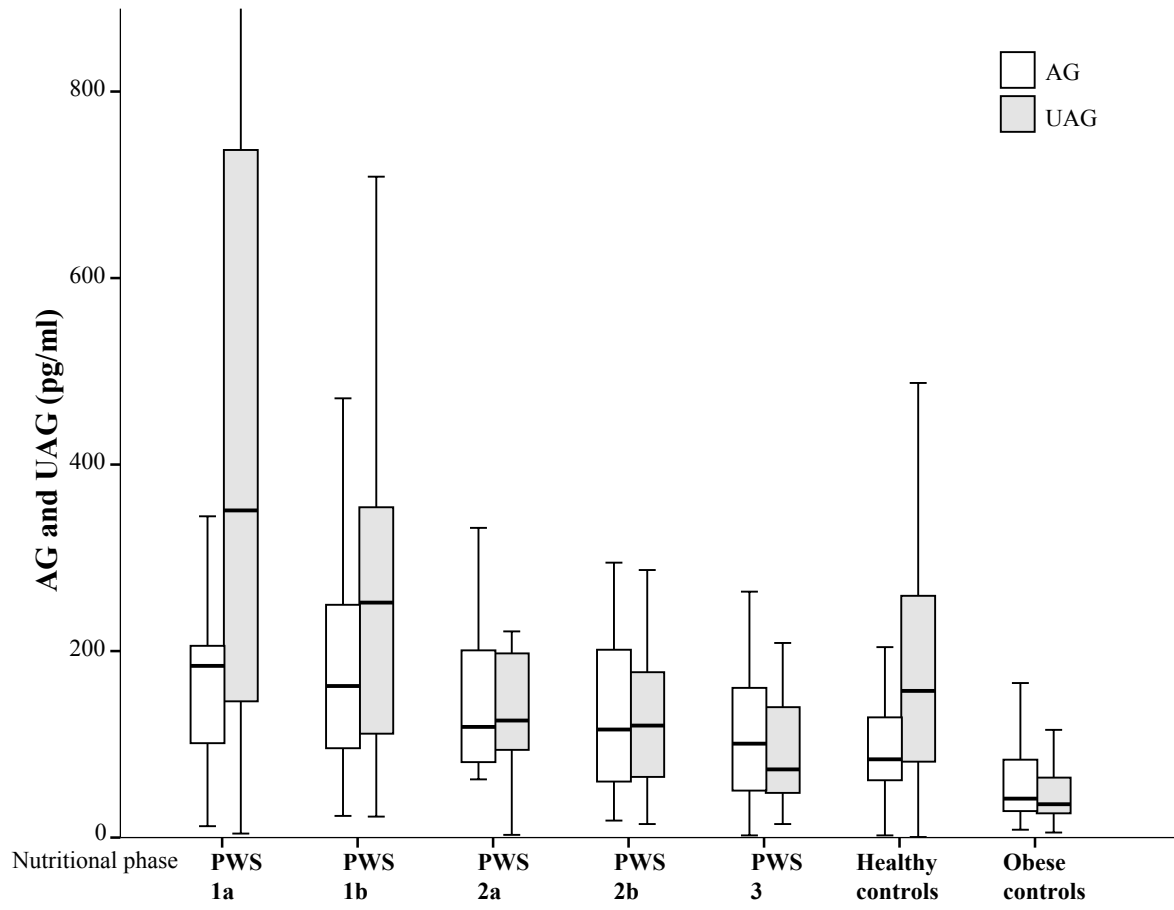

Supplement: MOESM1 [file 9136696]
